# Supplementary material
Source: Elsevier journal article supplement (https://rcastoragev2.blob.core.windows.net/2164f250442cfae077f6a2e05852aafd/mmc1.pdf)
Supplement: mmc1 [file mmc1.pdf]

# THE LANCET

## Supplementary appendix

This appendix formed part of the original submission and has been peer reviewed. We post it as supplied by the authors. **This online publication has been corrected. The corrected version first appeared at [thelancet.com](http://thelancet.com) on February 7, 2017**

Supplement to: Stringhini S, Cristian C, Jokela M, et al, for the LIFEPAATH consortium. Socioeconomic status and the 25 × 25 risk factors as determinants of premature mortality: a multicohort study and meta-analysis of 1·7 million men and women. *Lancet* 2017; published online Jan 31. [http://dx.doi.org/10.1016/S0140-6736\(16\)32380-7](http://dx.doi.org/10.1016/S0140-6736(16)32380-7).

## Web appendices

| Contents                                                                                | Page |
|-----------------------------------------------------------------------------------------|------|
| 1. Details on the study design and participants of the cohorts included in the analysis | 1    |
| 2. Study characteristics                                                                | 5    |
| 3. Quality assessment of included studies                                               | 7    |
| 4. Details on measurements of the 25x25 risk factors                                    | 9    |
| 5. Sensitivity analyses                                                                 | 11   |

### Appendix 1. Details on the study design and participants of the cohorts included in the analysis

**COLAUS.** The CoLaus (COhorte LAUSannoise) is an ongoing prospective study assessing the clinical, biological and genetic determinants of cardiovascular disease in the city of Lausanne, Switzerland. The initial survey was conducted between 2003 and 2006 and included 6733 participants aged between 35 and 75 years; the first follow-up survey was conducted 5.5 years afterwards and included 5064 participants. In each survey, data on socio-economic status, lifestyle, mental status and cardiovascular risk factors is collected by questionnaire or clinical examination. [http://www.colaus.ch/en/cls\\_home/cls\\_pro\\_home.htm](http://www.colaus.ch/en/cls_home/cls_pro_home.htm)

**GAZEL.** The GAZEL study was established in 1989 among employees of the French national gas and electricity company, Electricité de France-Gaz de France (EDF-GDF). At baseline (1989), 20,625 employees (15,011 men and 5,614 women), aged 35–50, gave consent to participate. The study design consists of an annual questionnaire used to collect data on health, lifestyle, individual, familial, social and occupational factors, and life events. <http://www.gazel.inserm.fr/en/>

**CONSTANCES.** The CONSTANCES cohort was established in late 2012. It was designed as a randomly selected representative sample of French adults aged 18–69 years at inception; 200,000 subjects will be included over a five-year period. At enrolment the participants fill questionnaires collecting data on health, lifestyle, individual, familial, social and occupational factors, and life events and benefits from a comprehensive health examination. The follow-up includes a yearly self-administered questionnaire, a health examination every 5 years and an annual linkage to social and health national databases (Zins et al, 2015). [http://www.constances.fr/index\\_EN.php](http://www.constances.fr/index_EN.php)

**WHITEHALL-II.** The Whitehall II study was established in 1985 to examine the socioeconomic gradient in health among 10,308 London-based civil servants (6,895 men and 3,413 women) aged 35–55. Baseline examination (phase 1) took place during 1985–1988, and involved a clinical examination and a self-administered questionnaire containing sections on demographic characteristics, health, lifestyle factors, work characteristics, social support, and life events. <https://www.ucl.ac.uk/whitehallII>

**ELSA.** The English Longitudinal Study of Ageing (ELSA) is a panel study of a representative cohort of men and women living in England aged ≥50 years. It was designed as a sister study to the Health and Retirement Study in the USA and is multidisciplinary in orientation, involving the collection of economic,

social, psychological, cognitive, health, biological and genetic data. The study commenced in 2002, and the sample has been followed up every 2 years. Data are collected using computer-assisted personal interviews and self-completion questionnaires, with additional nurse visits for the assessment of biomarkers every 4 years. The original sample consisted of 11 391 members ranging in age from 50 to 100 years. <http://www.elsa-project.ac.uk/>

**EPIC.** EPIC is a multicenter prospective cohort study, which recruited 518,408 volunteers from 23 centres in 10 countries (Sweden, Denmark, Norway, the Netherlands, United Kingdom, France, Germany, Spain, Italy, and Greece) between 1992 and 2000. In brief, the study population included volunteers aged mostly 25 to 70 years at the time of recruitment. Informed consent forms were filled at each local centre and the study was approved by the Institutional Review Board at the International Agency for Research on Cancer (IARC) and the local ethical committees. Lifestyle questionnaires included questions on dietary items, education, occupation, previous illness, alcohol and tobacco consumption, and physical activity. Diet was measured by extensive country-specific validated dietary questionnaires, aiming to provide high compliance rates and detect variations in dietary habits. Cancer incidence, mortality data and incident CVD events were obtained at the regional level. For Denmark, Italy, the Netherlands, Spain, Sweden, and the United Kingdom, such information was ascertained by means of record linkages with cancer registries, boards of health, and death indexes. Active follow-up by mail or telephone with participants, municipal registries, regional health departments, physicians and hospitals were adopted in Germany, Greece, and France. We are including in Lifepath centres from EPIC Italy (N=34,148) with the exclusion of Florence. <http://epic.iarc.fr/centers/italy.php>

**E3N.** The E3N study (Étude Epidémiologique auprès de femmes de la Mutuelle Générale de l'Education Nationale) is a prospective cohort of 98,995 women aged 40-65 years at recruitment in 1990 and it constitutes the French component of EPIC. The study was established to produce a large mass of data relevant for the identification of environmental and molecular causes of cancer and other chronic diseases, and to contribute to the development of effective public health strategies. Data on residence, education, early life events, exposures, lifestyle factors and life events were collected at baseline and follow-up questionnaires were sent every 2-3 years with more than 80% response. Mortality data were obtained by means of regular record linkage with various French mortality databases. <http://www.e3n.fr/>

**MCCS.** The Melbourne Collaborative Cohort Study is a prospective cohort study of 41,514 participants (24,469 women) living in Melbourne, Australia. Caucasian volunteers aged between 40 and 69 years were recruited in randomly selected census districts. At baseline (1990–1994), participants attended clinics where demographic, lifestyle and dietary information were collected and anthropometric measurements were performed. [http://www.cancervic.org.au/research/epidemiology/health\\_2020/health2020-overview](http://www.cancervic.org.au/research/epidemiology/health_2020/health2020-overview)

**EPIPORTO.** The EPIPorto study was initiated in 1999 and recruited 2485 adult dwellers aged 18 years or more in the city of Porto, northwest of Portugal. Briefly, simple random digit dialing of landline telephones was used to select households. The vast majority of houses (>95%) had a landline telephone at the time of this procedure. We used a table of random numbers to define the last four digits that are specific to individual houses, assuming the local prefix codes to limit the universe to the city of Porto. Non-existing numbers, those corresponding to fax numbers or telephone numbers of non-individual subscribers were ignored. The household was considered unreachable after at least four dialing attempts at different hours and including week and weekend days. Within each household, a permanent resident aged 18 years or more was selected using simple random sampling. The proportion of participation was 70%. A follow-up evaluation was conducted from 2005 to 2008 (participation rate=68% of the baseline sample), by trained interviewers, using structured questionnaires and forms, following the same protocol for data collection as at baseline. In both evaluations, participants were invited to visit our Department at Medical School for an interview, which

included a questionnaire on social, demographic, behavioural and clinical data, and a physical examination including blood collection.

**NCDS.** The NCDS (National Child Development Study) recruited 17 415 babies born in one week of 1958 (98.2% of all births that week) in Great Britain (England, Scotland and Wales). Participants were surveyed at birth and ages 7, 11, 16, 23, 33, 42, 44/45, 46 and 50. Information was collected on economic, medical, developmental and social aspects of participants' lives. At age 46/47 (the cut-off age of this study), a sub-sample of participants (n = 11881, 77.9% of the target) took part in a biomedical survey (Power & Elliott, 2006). <http://www.cls.ioe.ac.uk/page.aspx?&siteid=724&siteidtitle=Welcome+to+the+1958+National+Child+Development+Study>

**WHIP.** The Work History Panel is based on a sample of individual-level data from the Social Security Administration archives in Italy, covering almost 8% of all Italian workers employed in the private sector in 1985-2010. Unlike all other cohorts in LIFEPAth, it does not have biological samples, but it provides very rich information on income, pensions, unemployment benefits, disability indemnities, workplace and job contracts, linked to hospital and mortality follow-up. <http://www.eui.eu/Research/Library/ResearchGuides/Economics/Statistics/DataPortal/WHIP.aspx>

**NHANES.** The National Health and Nutrition Examination Survey (NHANES) is a program of studies designed to assess the health and nutritional status of adults and children in the United States. The survey is unique in that it combines interviews and physical examinations. NHANES is a major program of the National Center for Health Statistics (NCHS). NCHS is part of the Centers for Disease Control and Prevention (CDC) and has the responsibility for producing vital and health statistics for the Nation. The NHANES program began in the early 1960s and has been conducted as a series of surveys focusing on different population groups or health topics. In 1999, the survey became a continuous program that has a changing focus on a variety of health and nutrition measurements to meet emerging needs. The survey examines a nationally representative sample of about 5,000 persons each year. These persons are located in counties across the country, 15 of which are visited each year. The NHANES interview includes demographic, socioeconomic, dietary, and health-related questions. The examination component consists of medical, dental, and physiological measurements, as well as laboratory tests administered by highly trained medical personnel. <http://www.cdc.gov/nchs/nhanes/>

**NHIS.** The National Health Interview Survey (NHIS) is the principal source of information on the health of the civilian non-institutionalized population of the United States and is one of the major data collection programs of the National Center for Health Statistics (NCHS) which is part of the Centers for Disease Control and Prevention (CDC). The National Health Survey Act of 1956 provided for a continuing survey and special studies to secure accurate and current statistical information on the amount, distribution, and effects of illness and disability in the United States and the services rendered for or because of such conditions. The survey referred to in the Act, now called the National Health Interview Survey, was initiated in July 1957. While the NHIS has been conducted continuously since 1957, the content of the survey has been updated about every 10-15 years. In 1996, a substantially revised NHIS questionnaire began field testing. <http://www.cdc.gov/nchs/nhis/>

**Alameda County Study.** The Alameda County Study was designed to investigate normal daily routines and social-support factors to determine which might be risk factors for poor health and mortality in a real community. In 1965, a probability sample of the population of Alameda County, California was invited to participate in a study on health status, social networks, and other personal characteristics. The follow-up group contained 6,928 participants who completed questionnaires and were followed at intervals for up to 20 years after the initial investigation. <http://www.epi.umn.edu/cvdepi/study-synopsis/alameda-county-study/>

**HALS.** Health and Lifestyle Survey was undertaken in County Durham and Darlington (United Kingdom) in order to inform health strategies of the Primary Care Trusts. A stratified random sample of the population was asked to participate and a questionnaire was posted to those people who consented. The compelling message this survey sends out is the importance of deprivation in health inequalities and behavioural risks. Deprivation is a complex interaction of factors, which include environment, income, education, housing, employment and social capacity. Therefore to improve health and reduce inequalities, the NHS cannot act in isolation. Without co-ordinated action at all levels and across all agencies, no improvement will be seen in this unacceptable variation.  
[https://www.nepho.org.uk/publications/487/Health\\_and\\_Lifestyle\\_Survey](https://www.nepho.org.uk/publications/487/Health_and_Lifestyle_Survey)

**HRS.** The University of Michigan Health and Retirement Study (HRS) is a longitudinal panel study that surveys a representative sample of approximately 20,000 people in America over the age of 50 every two years. Supported by the National Institute on Aging (NIA U01AG009740) and the Social Security Administration, the HRS explores the changes in labor force participation and the health transitions that individuals undergo toward the end of their work lives and in the years that follow. Since its launch in 1992, the study has collected information about income, work, assets, pension plans, health insurance, disability, physical health and functioning, cognitive functioning, and health care expenditures. Through its unique and in-depth interviews, the HRS provides an invaluable and growing body of multidisciplinary data that researchers can use to address important questions about the challenges and opportunities of aging.  
<http://hrsonline.isr.umich.edu/index.php?p=start>

**MIDUS.** The first national survey of Midlife Development in the U.S. (MIDUS) was conducted in 1995/96 by the MacArthur Foundation Research Network on Successful Midlife Development. The study was conceived by a multidisciplinary team of scholars from fields of psychology, sociology, epidemiology, demography, anthropology, medicine, and health care policy. Their collective aim was to investigate the role of behavioral, psychological, and social factors in accounting for age-related variations in health and well-being in a national sample of Americans. In addition to a national probability sample (N = 3,487), the study included over-samples in select metropolitan areas (N = 757), a sample of siblings (N = 950) of the main respondents, and a national sample of twin pairs (N=1,914). <http://midus.wisc.edu/scopeofstudy.php>

**WLSG and WLSS.** The Wisconsin Longitudinal Study has followed a random sample of 10317 participants (5326 women, 4991 men) who were born between 1937 and 1940 and who graduated from Wisconsin high schools in 1957 (graduate sample, WLSG). After baseline data collection in 1957, survey data have been collected from the participants or their parents in 1964, 1975, 1992/3, and 2003/5. The present study used data from the 1993/1994 follow-up. The WLS sample is broadly representative of white, non-Hispanic American men and women who have completed at least a high school education (among Americans aged 50 to 54 in 1990 and 1991, approximately 66 percent were non-Hispanic white persons who completed at least 12 years of schooling). It is estimated that about 75 percent of Wisconsin youth graduated from high school in the late 1950s – everyone in the primary WLS sample graduated from high school. In addition to the main sample of the 1957 high school graduates, the WLS has also collected data on a selected sibling of a sample of the graduates (sibling sample, WLSS). The data collection in adulthood has been very similar although not entirely identical for the siblings as for the graduates. For the present purposes, the sibling sample was analyzed separately from the graduate sample, because the sampling frame of the individuals for the graduate cohort and sibling cohort was considered to sufficiently justify the decision of not combining the samples. Baseline data were from the 1994/1995 follow-up.

## Appendix 2. Study characteristics

| Study        | Baseline Year | Country                    | N participants  | Mean follow-up | Age at baseline,<br>mean (SD) | Origin                                                                                   |
|--------------|---------------|----------------------------|-----------------|----------------|-------------------------------|------------------------------------------------------------------------------------------|
|              |               |                            | Men / Women     | Men / Women    | Men / Women                   |                                                                                          |
| COLAUS       | 2003—2006     | Switzerland, Lausanne      | 3189<br>3544    | 6·2<br>6·2     | 52·2 (10·7)<br>53·0 (10·7)    | Population-based                                                                         |
| EPIPORTO     | 1995–2005     | Portugal, Porto            | 946<br>1539     | 6·8<br>6·4     | 53·4 (15·8)<br>52·6 (15·2)    | Population-based                                                                         |
| GAZEL        | 1989          | France                     | 15011<br>5614   | 25·3<br>25·8   | 44·5 (2·9)<br>41·7 (4·2)      | Occupational cohort<br>(EDF-GDF<br>employees)                                            |
| EPIC Italy   | 1992–1998     | Italy, 4 cities            | 11657<br>22494  | 16·0<br>15·4   | 49·6 (7·6)<br>49·6 (8·2)      | Population based                                                                         |
| ELSA         | 2004–2005     | United Kingdom,<br>England | 3948<br>4831    | 7·3<br>7·5     | 66·1 (9·5)<br>66·9 (10·0)     | Population based                                                                         |
| NCDS         | 1999–2005     | United Kingdom             | 5882<br>5998    | 7·5<br>7·7     | 45·0 (2·9)<br>45·2 (2·1)      | Birth<br>cohort/population<br>based                                                      |
| WHITEHALL II | 1991–1994     | United Kingdom,<br>London  | 6057<br>2758    | 20·3<br>20·3   | 49·9 (6·0)<br>51·1 (6·2)      | Occupational cohort<br>(British civil servants)                                          |
| MCCS         | 1990–1994     | Australia                  | 17045<br>24469  | 17·0<br>17·8   | 55·8 (8·8)<br>55·0 (8·6)      | Population based                                                                         |
| E3N          | 1989–1991     | France                     | —<br>98995      | —<br>16·2      | —<br>49·4 (6·7)               | Occupational cohort<br>(employees of the<br>education sector)                            |
| WHIP         | 1990–2012     | Italy                      | 146279<br>77304 | 11·8<br>11·1   | 57·8 (4·0)<br>57·6 (3·2)      | Occupational cohort<br>(random sample of<br>workers retired from<br>private enterprises) |
| NHANES I     | 1971-1974     | USA                        | 5802<br>8588    | 16·7<br>19·0   | 51·4 (15·3)<br>47·1 (15·5)    | Population-based                                                                         |
| NHANES II    | 1976-1980     | USA                        | 4336<br>4885    | 12·8<br>13·7   | 54·3 (13·3)<br>54·3 (13·4)    | Population-based                                                                         |
| NHANES III   | 1988-1994     | USA                        | 8461<br>9638    | 13·0<br>13·4   | 47·1 (20·5)<br>46·6 (20·5)    | Population-based                                                                         |
| NHANES 1999  | 1999-2000     | USA                        | 2300<br>2575    | 10·5<br>10·9   | 47·9 (20·9)<br>46·3 (20·8)    | Population-based                                                                         |
| NHANES 2001  | 2001-2002     | USA                        | 2835<br>3141    | 9·1<br>9·4     | 47·2 (20·5)<br>46·6 (21·0)    | Population-based                                                                         |
| NHANES 2003  | 2003-2004     | USA                        | 2688<br>2916    | 7·4<br>7·6     | 47·6 (21·0)<br>47·4 (21·2)    | Population-based                                                                         |
| NHANES 2005  | 2005-2006     | USA                        | 2669<br>2882    | 5·7<br>5·8     | 46·2 (20·2)<br>44·2 (20·3)    | Population-based                                                                         |
| NHANES 2007  | 2007-2008     | USA                        | 2903<br>3017    | 3·9<br>3·9     | 50·6 (17·9)<br>51·0 (18·0)    | Population-based                                                                         |
| NHIS 1986    | 1986          | USA                        | 20026<br>22568  | 21·8<br>22·5   | 42·8 (17·3)<br>44·2 (18·1)    | Population-based                                                                         |
| NHIS 1987    | 1987          | USA                        | 39293<br>44934  | 21·2<br>21·8   | 43·1 (17·2)<br>44·4 (18·1)    | Population-based                                                                         |
| NHIS 1988    | 1988          | USA                        | 39505<br>44880  | 20·5<br>21·1   | 43·4 (17·2)<br>44·8 (18·1)    | Population-based                                                                         |
| NHIS 1989    | 1989          | USA                        | 37790<br>42895  | 19·9<br>20·3   | 43·3 (17·1)<br>44·7 (18·0)    | Population-based                                                                         |
| NHIS 1990    | 1990          | USA                        | 38710<br>44009  | 19·2<br>19·6   | 43·3 (17·1)<br>44·7 (18·0)    | Population-based                                                                         |

|                |         |                 |                |              |                            |                                      |
|----------------|---------|-----------------|----------------|--------------|----------------------------|--------------------------------------|
| NHIS 1991      | 1991    | USA             | 38656<br>43746 | 18.4<br>18.9 | 43.7 (17.0)<br>44.9 (17.9) | Population-based                     |
| NHIS 1992      | 1992    | USA             | 41026<br>46230 | 18.5<br>18.9 | 43.4 (16.9)<br>44.9 (17.9) | Population-based                     |
| NHIS 1993      | 1993    | USA             | 35413<br>39840 | 17.0<br>17.3 | 43.7 (16.9)<br>45.1 (17.8) | Population-based                     |
| NHIS 1994      | 1994    | USA             | 37081<br>41877 | 16.1<br>16.4 | 44.1 (16.9)<br>45.6 (17.9) | Population-based                     |
| NHIS 1995      | 1995    | USA             | 32310<br>36326 | 15.4<br>15.7 | 43.7 (16.8)<br>44.9 (17.7) | Population-based                     |
| NHIS 1996      | 1996    | USA             | 20068<br>22270 | 14.7<br>14.8 | 43.5 (16.6)<br>44.8 (17.5) | Population-based                     |
| NHIS 1997      | 1997    | USA             | 14797<br>19582 | 13.8<br>14.0 | 45.2 (17.0)<br>46.8 (18.5) | Population-based                     |
| NHIS 1998      | 1998    | USA             | 13448<br>17129 | 13.0<br>13.1 | 45.5 (17.2)<br>47.3 (18.3) | Population-based                     |
| NHIS 1999      | 1999    | USA             | 12503<br>16572 | 12.2<br>12.3 | 45.9 (17.4)<br>47.4 (18.3) | Population-based                     |
| NHIS 2000      | 2000    | USA             | 13230<br>17363 | 11.4<br>11.5 | 45.4 (17.2)<br>47.1 (18.4) | Population-based                     |
| NHIS 2001      | 2001    | USA             | 13663<br>17692 | 10.5<br>10.6 | 45.3 (17.1)<br>47.1 (18.2) | Population-based                     |
| NHIS 2002      | 2002    | USA             | 12275<br>15934 | 9.6<br>9.7   | 45.7 (17.2)<br>47.4 (18.5) | Population-based                     |
| NHIS 2003      | 2003    | USA             | 12275<br>15934 | 8.8<br>8.8   | 45.7 (17.2)<br>47.6 (18.4) | Population-based                     |
| NHIS 2004      | 2004    | USA             | 12977<br>16215 | 8.2<br>8.2   | 46.2 (17.2)<br>48.0 (18.5) | Population-based                     |
| NHIS 2005      | 2005    | USA             | 12791<br>16338 | 6.9<br>7.0   | 46.8 (17.3)<br>48.1 (18.3) | Population-based                     |
| NHIS 2006      | 2006    | USA             | 10355<br>13063 | 6.0<br>6.1   | 46.1 (17.4)<br>47.7 (18.5) | Population-based                     |
| NHIS 2007      | 2007    | USA             | 10056<br>12636 | 5.1<br>5.1   | 46.7 (17.4)<br>48.0 (18.3) | Population-based                     |
| NHIS 2008      | 2008    | USA             | 9345<br>12017  | 4.2<br>4.2   | 46.9 (17.4)<br>48.7 (18.5) | Population-based                     |
| NHIS 2009      | 2009    | USA             | 12105<br>15279 | 3.2<br>3.2   | 47.0 (17.6)<br>48.3 (18.3) | Population-based                     |
| Alameda County | 1965    | USA, California | 3157<br>3769   | 27.5<br>28.9 | 43.6 (15.5)<br>43.9 (16.6) | Population-based                     |
| HALS           | 1984-85 | United Kingdom  | 3903<br>5098   | 20.3<br>21.3 | 45.6 (17.6)<br>46.1 (17.8) | Population-based                     |
| HRS            | 1992    | USA             | 5866<br>6783   | 16.3<br>17.9 | 57.0 (5.4)<br>53.7 (5.5)   | Population-based                     |
| MIDUS          | 1995-96 | USA             | 3001<br>3319   | 11.4<br>11.5 | 46.8 (12.8)<br>47.0 (13.0) | Occupational cohort,<br>midwives     |
| WLSG           | 1992-93 | USA, Wisconsin  | 3971<br>4473   | 15.0<br>15.2 | 54.2 (0.5)<br>54.1 (0.5)   | High school graduates                |
| WLSS           | 1994-95 | USA, Wisconsin  | 2563<br>2756   | 12.8<br>13.0 | 52.7 (7.4)<br>53.0 (7.3)   | Siblings of high<br>school graduates |

CI: Confidence Interval. SD: Standard Deviation. ELSA: English Longitudinal Study on Ageing; NCDS: National Child Development Study; MCCS: Melbourne Collaborative Cohort Study; NHANES: National Health and Nutrition Examination Survey; NHIS: National Health Interview Survey; HALS: Health and Lifestyle Survey; HRS: Health and Retirement Study; MIDUS: Midwives in the United States Study; WLSG: Wisconsin Longitudinal Study (Graduate sample); WLSS: Wisconsin Longitudinal Study (Siblings sample).

### Appendix 3. Quality assessment of included studies

To assess study quality, we evaluated potential bias in the following domains:

1. Was selection of exposed and non-exposed cohorts drawn from the same population?
2. Can we be confident in the assessment of exposure?
3. Can we be confident that the outcome of interest was not present at start of the study?
4. Did the statistical analysis adjust for the confounding variables?
5. Can we be confident in the assessment of the presence or absence of confounding factors?
6. Can we be confident in the assessment of outcome?
7. Was the follow up of cohorts adequate?

The studies were evaluated in relation to each question using 4 categories: ++ “definitely yes”, + “probably/mostly yes”, - “probably/mostly no”, and -- “definitely no”. The quality of the study was considered high if all domains were evaluated favourably (++ or +).

|                | 1 Exposed and unexposed from the same population | 2 Confidence in exposure assessment | 3 Confidence in exclusion of prevalent cases | 4 Comprehensive adjustments | 5 Confidence in confounders assessment | 6 Confidence in outcome assessment | 7 Adequate follow-up | HIGH QUALITY |
|----------------|--------------------------------------------------|-------------------------------------|----------------------------------------------|-----------------------------|----------------------------------------|------------------------------------|----------------------|--------------|
| EPIPORTO       | ++                                               | ++                                  | ++                                           | ++                          | ++                                     | ++                                 | +                    | Yes          |
| ELSA           | ++                                               | ++                                  | ++                                           | ++                          | +                                      | ++                                 | +                    | Yes          |
| Whitehall II   | ++                                               | ++                                  | ++                                           | ++                          | ++                                     | ++                                 | ++                   | Yes          |
| NHANES I       | ++                                               | ++                                  | ++                                           | ++                          | ++                                     | ++                                 | ++                   | Yes          |
| NHANES II      | ++                                               | ++                                  | ++                                           | ++                          | ++                                     | ++                                 | ++                   | Yes          |
| NHANES III     | ++                                               | ++                                  | ++                                           | ++                          | ++                                     | ++                                 | ++                   | Yes          |
| NHANES 1999    | ++                                               | ++                                  | ++                                           | ++                          | ++                                     | ++                                 | ++                   | Yes          |
| NHANES 2001    | ++                                               | ++                                  | ++                                           | ++                          | ++                                     | ++                                 | +                    | Yes          |
| NHANES 2003    | ++                                               | ++                                  | ++                                           | ++                          | ++                                     | ++                                 | +                    | Yes          |
| NHANES 2005    | ++                                               | ++                                  | ++                                           | ++                          | ++                                     | ++                                 | +                    | Yes          |
| NHANES 2007    | ++                                               | ++                                  | ++                                           | ++                          | ++                                     | ++                                 | +                    | Yes          |
| NHIS 1997      | ++                                               | ++                                  | ++                                           | ++                          | +                                      | ++                                 | ++                   | Yes          |
| NHIS 1998      | ++                                               | ++                                  | ++                                           | ++                          | +                                      | ++                                 | ++                   | Yes          |
| NHIS 1999      | ++                                               | ++                                  | ++                                           | ++                          | +                                      | ++                                 | ++                   | Yes          |
| NHIS 2000      | ++                                               | ++                                  | ++                                           | ++                          | +                                      | ++                                 | ++                   | Yes          |
| NHIS 2001      | ++                                               | ++                                  | ++                                           | ++                          | +                                      | ++                                 | ++                   | Yes          |
| NHIS 2002      | ++                                               | ++                                  | ++                                           | ++                          | +                                      | ++                                 | +                    | Yes          |
| NHIS 2003      | ++                                               | ++                                  | ++                                           | ++                          | +                                      | ++                                 | +                    | Yes          |
| NHIS 2004      | ++                                               | ++                                  | ++                                           | ++                          | +                                      | ++                                 | +                    | Yes          |
| NHIS 2005      | ++                                               | ++                                  | ++                                           | ++                          | +                                      | ++                                 | +                    | Yes          |
| NHIS 2006      | ++                                               | ++                                  | ++                                           | ++                          | +                                      | ++                                 | +                    | Yes          |
| NHIS 2007      | ++                                               | ++                                  | ++                                           | ++                          | +                                      | ++                                 | +                    | Yes          |
| NHIS 2008      | ++                                               | ++                                  | ++                                           | ++                          | +                                      | ++                                 | +                    | Yes          |
| NHIS 2009      | ++                                               | ++                                  | ++                                           | ++                          | +                                      | ++                                 | +                    | Yes          |
| Alameda County | ++                                               | ++                                  | ++                                           | ++                          | +                                      | ++                                 | ++                   | Yes          |
| HALS           | ++                                               | ++                                  | ++                                           | ++                          | ++                                     | ++                                 | ++                   | Yes          |
| HRS            | ++                                               | ++                                  | ++                                           | ++                          | +                                      | ++                                 | ++                   | Yes          |
| MIDUS          | ++                                               | ++                                  | ++                                           | ++                          | +                                      | ++                                 | ++                   | Yes          |
| WLSG           | ++                                               | ++                                  | ++                                           | ++                          | +                                      | ++                                 | ++                   | Yes          |
| WLSS           | ++                                               | ++                                  | ++                                           | ++                          | +                                      | ++                                 | ++                   | Yes          |
| COLAUS         | -                                                | ++                                  | ++                                           | ++                          | ++                                     | ++                                 | +                    | No           |
| GAZEL          | -                                                | ++                                  | ++                                           | ++                          | +                                      | ++                                 | ++                   | No           |
| EPIC Italy     | -                                                | ++                                  | ++                                           | ++                          | ++                                     | ++                                 | ++                   | No           |
| NCDS           | ++                                               | ++                                  | ++                                           | -                           | ++                                     | ++                                 | +                    | No           |



|           |    |    |    |    |    |    |    |    |
|-----------|----|----|----|----|----|----|----|----|
| MCCS      | -  | -  | ++ | ++ | ++ | ++ | ++ | No |
| E3N       | -  | ++ | ++ | -  | +  | ++ | ++ | No |
| WHIP      | ++ | ++ | ++ | -  | -  | ++ | ++ | No |
| NHIS 1986 | ++ | ++ | ++ | -  | +  | ++ | ++ | No |
| NHIS 1987 | ++ | ++ | ++ | -  | +  | ++ | ++ | No |
| NHIS 1988 | ++ | ++ | ++ | -  | +  | ++ | ++ | No |
| NHIS 1989 | ++ | ++ | ++ | -  | +  | ++ | ++ | No |
| NHIS 1990 | ++ | ++ | ++ | -  | +  | ++ | ++ | No |
| NHIS 1991 | ++ | ++ | ++ | -  | +  | ++ | ++ | No |
| NHIS 1992 | ++ | ++ | ++ | -  | +  | ++ | ++ | No |
| NHIS 1993 | ++ | ++ | ++ | -  | +  | ++ | ++ | No |
| NHIS 1994 | ++ | ++ | ++ | -  | +  | ++ | ++ | No |
| NHIS 1995 | ++ | ++ | ++ | -  | +  | ++ | ++ | No |
| NHIS 1996 | ++ | ++ | ++ | -  | +  | ++ | ++ | No |

++ = *definitely yes*; + = *probably/mostly yes*; - = *probably/mostly no*; - - = *definitely no*.

In all studies, individuals with high and low SES were from the same cohort and response at baseline was 60% or higher in all studies, except COLAUS, GAZEL and E3N for which it was less than 50%. In MCCS and EPIC Italy, the eligible population was not clearly defined as the participants were recruited from universities, cafeterias etc. Self-reported assessment was considered reliable for SES, but this was missing for MCCS. There were no exclusions to prevalent cases in mortality analyses. The 25 x 25 risk factors (smoking, blood pressure, body mass index, diabetes, alcohol consumption, physical activity) were assessed in all studies except NCDS, E3N, WHIP and NHIS 1986-1996 which missed assessment of one or more 25x25 risk factors. Clinic measurements were used in COLAUS, EPIPORTO, EPIC ITALY, MCCS, NCDS, Whitehall II, NHANES I-III, 1999, 2001, 2003, 2005 and 2007, whereas other studies measured baseline variables using self-report assessment. Mortality ascertainment was reliable in all studies. The follow-up for mortality was optimal (>10 years) in most studies and adequate (>3 years) in all studies. Of the 48 studies, 30 were of high quality with all 7 domains evaluated favorably.

#### Appendix 4. Details on measurements of the 25x25 risk factors

**Measures.** *Socioeconomic position (SES)* was measured through occupational position, obtained from the European Socio-economic Classification (ESEC) (<https://www.iser.essex.ac.uk/archives/esec/user-guide>), which categorizes occupational position in 9 classes. For the LIFEAPTH Consortium harmonisation, a variable in 3 classes was obtained: High, including higher professionals and managers, lower professionals and managers, higher clerical, services and sales workers (Class 1, 2 and 3 ESEC); Intermediate, including small employers and self-employed, farmers, lower supervisors and technicians (Class 4, 5, and 6 ESEC); and low, including lower clerical, services and sales workers, skilled workers, semi- and unskilled workers (Class 7, 8, 9 ESEC). Occupational position was the last known one (current occupation for working individuals and last known occupation for those not currently working). For E3N, occupational position was current occupation 2-yr after baseline. In the cohorts from the United States, a similar occupational categorization was applied based on occupational groups defined by the Standard Occupational Classification codes.

*Smoking* was self-reported and was categorized into current smoking for individuals currently smoking, former smoking for individuals not currently smoking but who smoke in the past, and never smoking for individuals who never smoke.

*Alcohol consumption* was measured in alcohol units. For most cohorts, it was the average number of alcohol units over a week. For ELSA, it was the highest intake over a week. For EPIC-Italy, EPIPORTO and MCCS alcohol intake was measured in grams and they were converted to alcohol units by assuming that 12grams equal one alcohol unit. For E3N and GAZEL, alcohol consumption was available 3-yr after baseline.

High alcohol intake was defined as a consumption exceeding 21 alcohol units for men and 14 for women. Abstinence was defined as no alcohol consumption, and moderate intake was defined as consumption less or equal 21 alcohol units for men and 14 for women.

*Physical inactivity* was considered as less than 20 minutes of physical activity per week in COLAUS, neither moderate nor intense physical activity per day in EPIPORTO, neither moderate nor intense physical activity per week in E3N, none/light activity only for ELSA, as less than 1 hour of moderate and vigorous physical activity per week in WHITEHALL II, no physical activity in EPIC Italy, as not practicing sport in GAZEL, as a physical activity score of zero in MCCS. Physical inactivity was determined as participating in no weekly leisure-time aerobic activity that lasted at least 10 minutes in the NHIS; no moderate or vigorous physical activity over the past 30 days in the NHANES; no moderate or vigorous physical activity at least once a week in the HRS, MIDUS, WLSG, and WLSS; as not participating in sports or exercise in the HALS and ACS.

*Body mass index (BMI)* was measured as weight (Kg) divided by the square of height ( $m^2$ ). *Obesity* is defined as  $BMI \geq 30$ ; *Overweight* is defined as  $BMI \geq 25$  and  $BMI < 30$ ; *Normal BMI* is defined as  $BMI \geq 18.5$  and  $BMI < 25$ . For NCDS, the self-reported values of weight and height at wave 6 were used whenever the measured values during the biomedical survey at 2003 were not available. For E3N and GAZEL the values were self-reported. Height and weight were measured in the NHANES and HALS, and self-reported in ACS, HRS, NHIS, MIDUS, WLSG, and WLSS.

*Hypertension* was defined as the presence of at least one of the following conditions: systolic blood pressure  $\geq 140$  mmHg, recorded diastolic blood pressure  $\geq 90$  mmHg, current intake of anti-hypertensive medication, self-report. For most cohorts, the four conditions were available, for GAZEL only the self-reported information was available and for E3N only self-reported blood pressure values, and for NCDS knowledge of anti-hypertensive medication was not available. For most cohorts blood pressure values were the average of two readings, while EPIC-Italy had only one. Blood pressure was measured as the mean of two or three readings in the NHANES and HALS, and self-reported in ACS, HRS, MIDUS, WLSG, and WLSS.

*Diabetes* was defined as the presence of at least one of the following conditions: fasting glucose  $\geq 7$  mmol/L, 2h postload glucose  $\geq 11.1$  mmol/L, glycated hemoglobin  $\geq 6.5\%$ , self-report. All but E3N have self-reported information, WHITEHALL-II further has both fasting glucose and 2h post load glucose, ELSA and NCDS have glycated hemoglobin, and EPIPORTO and COLAUS fasting glucose. In the NHANES, diabetes was determined based on fasting glucose (except for NHANES I in which diabetes status was self-reported) or taking medication, and self-reported as whether the participant had been diagnosed of diabetes by a medical doctor in the ACS, HALS, HRS, MIDUS, NHIS, WLSG, and WLSS

*Marital status* was categorized as married/cohabiting individuals and single/separated/divorced/widowed individuals.

*Race/ethnicity* was categorized as white and non white individuals. Cohorts EPIC, GAZEL, E3N, EPIPORTO, MCCS only included individuals of white race/ethnicity. In the US cohorts, race/ethnicity was categorized with 4 groups (non-Hispanic white, black, Hispanic, other).

## Appendix 5. Sensitivity analyses

### ANALYSES RESTRICTED TO EUROPEAN COHORTS - MEN

| Risk factor                         | N Cohorts | N Deaths | N Participants | HR [95% CI]      | I <sup>2</sup> /tau <sup>2</sup> |
|-------------------------------------|-----------|----------|----------------|------------------|----------------------------------|
| Low SES (Ref. High)                 | 9         | 26976    | 175314         | 1.52 [1.44;1.60] | 0%/0                             |
| Current Smoking (Ref. Never)        | 8         | 5957     | 47352          | 2.36 [2.06;2.70] | 52.1%/0.0130                     |
| Diabetes                            | 8         | 5947     | 46027          | 1.83 [1.37;2.44] | 71.7%/0.0613                     |
| Physical Inactivity                 | 7         | 5365     | 39682          | 1.46 [1.22;1.76] | 82.5%/0.0347                     |
| High Alcohol Intake (Ref. Moderate) | 8         | 5444     | 44159          | 1.31 [1.11;1.56] | 74.1%/0.0297                     |
| Hypertension                        | 8         | 6052     | 47982          | 1.20 [1.02;1.42] | 81.4%/0.0351                     |
| Obesity (Ref. Normal BMI)           | 8         | 5059     | 44045          | 1.30 [1.00;1.69] | 82.5%/0.0789                     |

CI: Confidence Interval; HR: Hazard Ratio; SES: SocioEconomic Status; I<sup>2</sup>: heterogeneity statistic; tau<sup>2</sup>: inter-cohort variance

### ANALYSES RESTRICTED TO EUROPEAN COHORTS - WOMEN

| Risk factor                         | N Cohorts | N Deaths | N Participants | HR [95% CI]      | I <sup>2</sup> /tau <sup>2</sup> |
|-------------------------------------|-----------|----------|----------------|------------------|----------------------------------|
| Low SES (Ref. High)                 | 10        | 12707    | 154422         | 1.29 [1.15;1.44] | 30.1%/0.0065                     |
| Current Smoking (Ref. Never)        | 9         | 12739    | 144473         | 1.82 [1.59;2.07] | 57.7%/0.0101                     |
| Diabetes                            | 8         | 4250     | 48883          | 1.76 [1.41;2.19] | 48.9%/0.0372                     |
| Physical Inactivity                 | 8         | 10771    | 118113         | 1.41 [1.18;1.68] | 80.7%/0.0239                     |
| High Alcohol Intake (Ref. Moderate) | 9         | 9813     | 118430         | 1.24 [1.08;1.42] | 28.3%/0.0072                     |
| Hypertension                        | 9         | 9286     | 105233         | 1.13 [1.02;1.26] | 61.6%/0.0110                     |
| Obesity (Ref. Normal BMI)           | 9         | 11484    | 136259         | 1.44 [1.18;1.74] | 65.1%/0.0232                     |

CI: Confidence Interval; HR: Hazard Ratio; SES: SocioEconomic Status; I<sup>2</sup>: heterogeneity statistic; tau<sup>2</sup>: inter-cohort variance

### ANALYSES RESTRICTED TO PREMATURE MORTALITY (<70 years) - MEN

| Risk factor                         | N Cohorts | N Deaths | N Participants | HR [95% CI]       | I <sup>2</sup> /tau <sup>2</sup> |
|-------------------------------------|-----------|----------|----------------|-------------------|----------------------------------|
| Low SES (Ref. High)                 | 46        | 66809    | 591735         | 1.61 [1.55;1.67]  | 24.4%/0.0030                     |
| Current Smoking (Ref. Never)        | 35        | 21443    | 242229         | 2.63 [2.52;2.75]  | 0%/0                             |
| Diabetes                            | 35        | 27087    | 239766         | 2.27 [2.08;2.48]  | 48.6%/0.0240                     |
| Physical Inactivity                 | 34        | 21567    | 233758         | 1.65 [1.54; 1.77] | 65.3%/0.0241                     |
| High Alcohol Intake (Ref. Moderate) | 35        | 18736    | 216334         | 1.71 [1.53;1.92]  | 62.9%/0.0494                     |
| Hypertension                        | 35        | 22219    | 245666         | 1.57 [1.46;1.70]  | 68.9%/0.0291                     |
| Obesity (Ref. Normal BMI)           | 46        | 86321    | 580697         | 1.23 [1.16;1.32]  | 69.3%/0.0189                     |

CI: Confidence Interval; HR: Hazard Ratio; SES: SocioEconomic Status; I<sup>2</sup>: heterogeneity statistic; tau<sup>2</sup>: inter-cohort variance

### ANALYSES RESTRICTED TO PREMATURE MORTALITY (<70 years) - WOMEN

| Risk factor         | N Cohorts | N Deaths | N Participants | HR [95% CI]      | I <sup>2</sup> /tau <sup>2</sup> |
|---------------------|-----------|----------|----------------|------------------|----------------------------------|
| Low SES (Ref. High) | 47        | 38140    | 543745         | 1.51 [1.41;1.63] | 39.8%/0.0155                     |

|                                     |    |       |        |                   |              |
|-------------------------------------|----|-------|--------|-------------------|--------------|
| Current Smoking (Ref. Never)        | 36 | 20734 | 382867 | 2.30 [2.13;2.49]  | 72.1%/0.0407 |
| Diabetes                            | 35 | 21247 | 287861 | 2.73 [2.48;3.01]  | 51.2%/0.0340 |
| Physical Inactivity                 | 35 | 20386 | 358133 | 1.67 [1.53; 1.83] | 71.9%/0.0354 |
| High Alcohol Intake (Ref. Moderate) | 35 | 17201 | 320077 | 1.86 [1.60;2.16]  | 61.3%/0.0871 |
| Hypertension                        | 36 | 19463 | 348088 | 1.56 [1.44;1.68]  | 79.9%/0.0599 |
| Obesity (Ref. Normal BMI)           | 47 | 73729 | 730732 | 1.53 [1.44;1.62]  | 61.6%/0.0156 |

CI: Confidence Interval; HR: Hazard Ratio; SES: SocioEconomic Status; I<sup>2</sup>: heterogeneity statistic; tau<sup>2</sup>: inter-cohort variance

### ANALYSES RESTRICTED TO HIGH QUALITY STUDIES – MEN (see Appendix 3 for definition)

| Risk factor                         | N Cohorts | N Deaths | N Participants | HR [95% CI]      | I <sup>2</sup> /tau <sup>2</sup> |
|-------------------------------------|-----------|----------|----------------|------------------|----------------------------------|
| Low SES (Ref. High)                 | 30        | 16647    | 150760         | 1.43 [1.37;1.5]  | 10.83%/0.0014                    |
| Current Smoking (Ref. Never)        | 30        | 32294    | 215016         | 1.66 [1.53;1.8]  | 79.02%/0.0265                    |
| Diabetes                            | 30        | 33563    | 223439         | 1.3 [1.24;1.36]  | 62.58%/0.0073                    |
| Physical Inactivity                 | 30        | 31667    | 215696         | 0.95 [0.87;1.04] | 77.76%/0.0271                    |
| High Alcohol Intake (Ref. Moderate) | 30        | 32984    | 217822         | 1.64 [1.54;1.73] | 75.45%/0.0135                    |
| Hypertension                        | 30        | 26297    | 189377         | 1.55 [1.41;1.7]  | 63.22%/0.0318                    |
| Obesity (Ref. Normal BMI)           | 30        | 32074    | 218273         | 2.14 [2.02;2.26] | 66.97%/0.0152                    |

CI: Confidence Interval; HR: Hazard Ratio; SES: SocioEconomic Status; I<sup>2</sup>: heterogeneity statistic; tau<sup>2</sup>: inter-cohort variance

### ANALYSES RESTRICTED TO HIGH QUALITY STUDIES – WOMEN (see Appendix 3 for definition)

| Risk factor                         | N Cohorts | N Deaths | N Participants | HR [95% CI]      | I <sup>2</sup> /tau <sup>2</sup> |
|-------------------------------------|-----------|----------|----------------|------------------|----------------------------------|
| Low SES (Ref. High)                 | 30        | 11469    | 159845         | 1.38 [1.28;1.49] | 33.78%/0.0122                    |
| Current Smoking (Ref. Never)        | 30        | 32611    | 267332         | 1.85 [1.69;2.02] | 82.57%/0.032                     |
| Diabetes                            | 30        | 33747    | 277091         | 1.3 [1.22;1.39]  | 76.25%/0.0147                    |
| Physical Inactivity                 | 30        | 30116    | 255990         | 1.06 [0.99;1.15] | 71.92%/0.0175                    |
| High Alcohol Intake (Ref. Moderate) | 30        | 33243    | 271462         | 1.63 [1.54;1.72] | 74.66%/0.0142                    |
| Hypertension                        | 30        | 26738    | 235862         | 1.81 [1.56;2.1]  | 64.44%/0.1037                    |
| Obesity (Ref. Normal BMI)           | 30        | 32362    | 269815         | 2.05 [1.93;2.18] | 71.89%/0.0173                    |

CI: Confidence Interval; HR: Hazard Ratio; SES: SocioEconomic Status; I<sup>2</sup>: heterogeneity statistic; tau<sup>2</sup>: inter-cohort variance

### ANALYSES OF THE ASSOCIATION BETWEEN SES AND ALL-CAUSE MORTALITY RESTRICTED TO PARTICIPANTS WITHOUT RISK FACTORS

| Sub-groups              | N Cohorts | N Deaths | N Participants | HR [95% CI]      | I <sup>2</sup> /tau <sup>2</sup> |
|-------------------------|-----------|----------|----------------|------------------|----------------------------------|
| No Current Smoking      | 24        | 19656    | 297612         | 1.36 [1.29;1.44] | 20.2%/0.0032                     |
| No Diabetes             | 23        | 17657    | 283544         | 1.53 [1.46;1.61] | 3.2%/0.0004                      |
| No Hypertension         | 24        | 13889    | 261892         | 1.56 [1.47;1.65] | 12.7%/0.0024                     |
| No Obesity              | 35        | 72393    | 747161         | 1.42 [1.39;1.46] | 8.7%/0.0004                      |
| No Physical Inactivity  | 22        | 13728    | 212585         | 1.48 [1.38;1.60] | 40.8%/0.0117                     |
| No Heavy Alcohol Intake | 24        | 19257    | 302210         | 1.47 [1.39;1.54] | 24.5%/0.0039                     |
| No Risks Factors        | 21        | 2223     | 68770          | 1.26 [1.11;1.42] | 0.0%/0.0000                      |

CI: Confidence Interval; HR: Hazard Ratio; SES: SocioEconomic Status; I<sup>2</sup>: heterogeneity statistic; tau<sup>2</sup>: inter-cohort variance

#### ANALYSES RESTRICTED TO COHORTS WITH MEASURED HEIGHT AND WEIGHT (N COHORTS=16)

| Risk factor                       | N Deaths | N Participants | HR [95% CI]      | I <sup>2</sup> /tau <sup>2</sup> |
|-----------------------------------|----------|----------------|------------------|----------------------------------|
| Obesity (Ref. Normal BMI) - Men   | 15333    | 77849          | 1.02 [0.87;1.20] | 86.1%/0.0603                     |
| Obesity (Ref. Normal BMI) - Women | 13089    | 101028         | 1.14 [1.01;1.29] | 68.4%/0.0195                     |

CI: Confidence Interval; HR: Hazard Ratio; I<sup>2</sup>: heterogeneity statistic; tau<sup>2</sup>: inter-cohort variance

#### ANALYSES RESTRICTED TO COHORTS WITH MEAN MORTALITY FOLLOW-UP >10 YEARS

| Risk factor                             | N Deaths | N Participants | HR [95% CI]      | I <sup>2</sup> /tau <sup>2</sup> |
|-----------------------------------------|----------|----------------|------------------|----------------------------------|
| Obesity (Ref. Normal BMI) - Men, n=30   | 123213   | 523984         | 1.12 [1.05;1.21] | 85.7%/0.0130                     |
| Obesity (Ref. Normal BMI) - Women, n=31 | 128248   | 681084         | 1.25 [1.18;1.31] | 82.7%/0.0088                     |

CI: Confidence Interval; HR: Hazard Ratio; I<sup>2</sup>: heterogeneity statistic; tau<sup>2</sup>: inter-cohort variance

#### ANALYSES RESTRICTED TO COHORTS WITH BLOOD PRESSURE MEASURED USING STANDARD PROCEDURES (N COHORTS=15)

| Risk factor          | N Deaths | N Participants | HR [95% CI]      | I <sup>2</sup> /tau <sup>2</sup> |
|----------------------|----------|----------------|------------------|----------------------------------|
| Hypertension - Men   | 16539    | 81323          | 1.19 [1.12;1.27] | 50.4%/0.0056                     |
| Hypertension - Women | 14592    | 106463         | 1.21 [1.12;1.31] | 55.1%/0.0087                     |

CI: Confidence Interval; HR: Hazard Ratio; I<sup>2</sup>: heterogeneity statistic; tau<sup>2</sup>: inter-cohort variance

#### Appendix 6. Forest plot of the study-specific age-, sex-, marital status- and race/ethnicity-adjusted hazard ratios for 25x25 risk factors and mortality

PLEASE SEE PDF

**Age-, marital status- and race/ethnicity-adjusted hazard ratios for all-cause mortality  
in current smokers compared to never smokers – MEN**

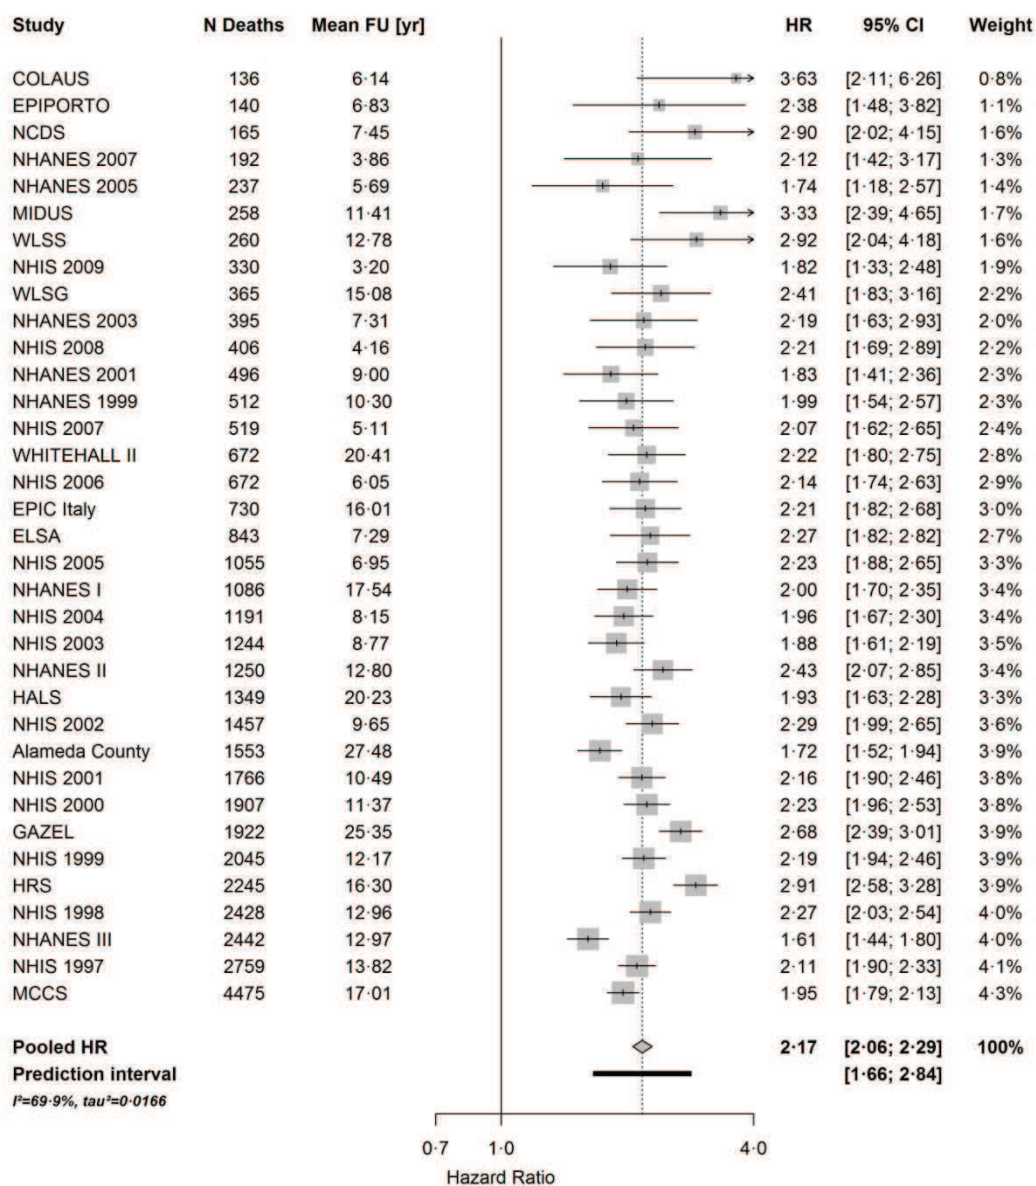

Pooled HR is represented with a gray diamond and the 95% prediction interval with a black bar.  $I^2$  statistic is the percentage of between study heterogeneity;  $\tau^2$  statistics measures the inter-study variance. The prediction interval provides a predicted range for the true association between smoking and all-cause mortality.



**Age-, marital status- and race/ethnicity-adjusted hazard ratios for all-cause mortality  
in current smokers compared to never smokers – WOMEN**

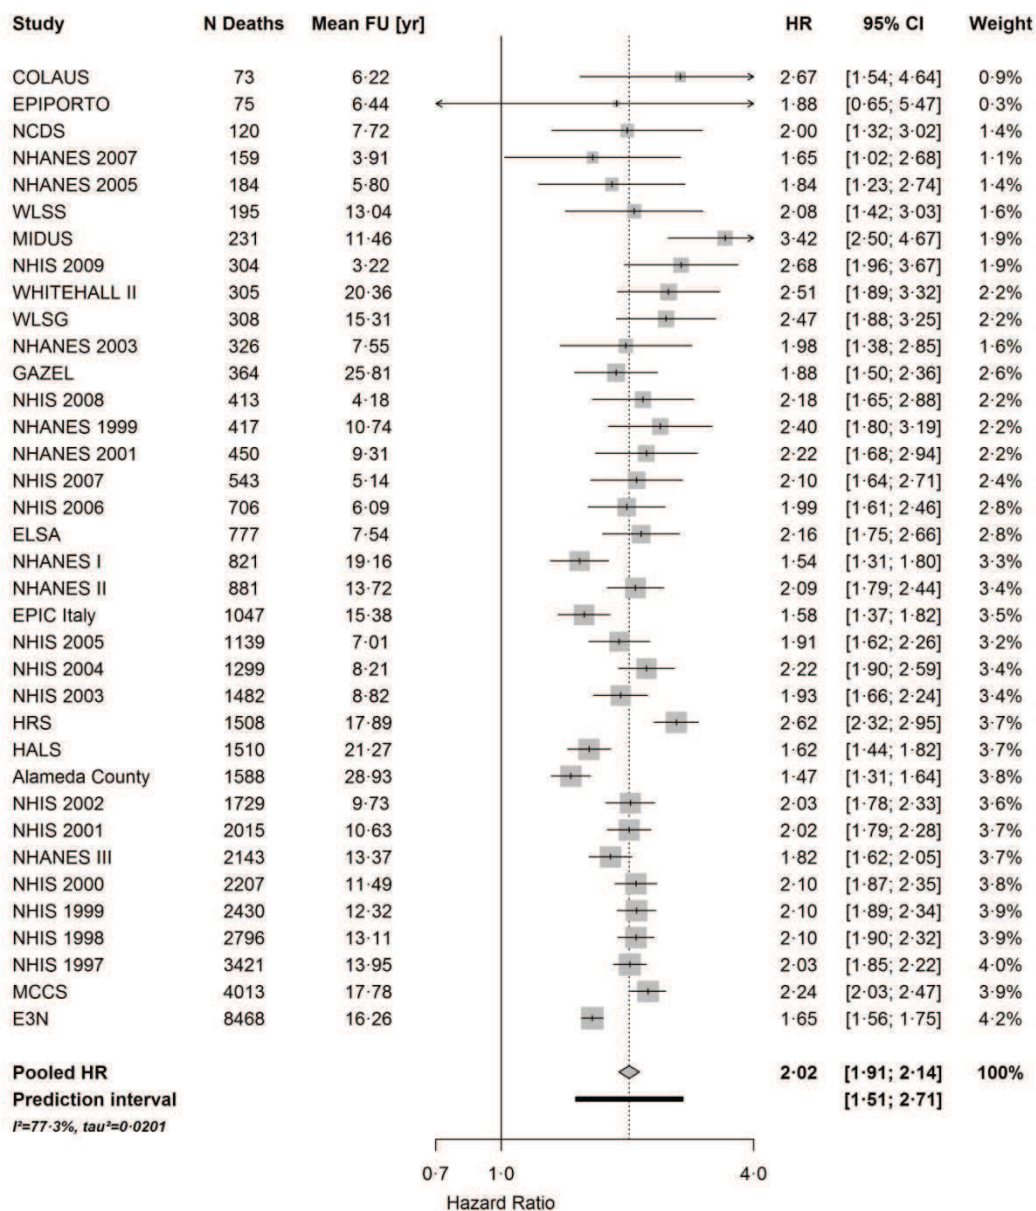

Pooled HR is represented with a gray diamond and the 95% prediction interval with a black bar.  $I^2$  statistic is the percentage of between study heterogeneity;  $\tau^2$  statistics measures the inter-study variance. The prediction interval provides a predicted range for the true association between smoking and all-cause mortality.



**Age-, marital status- and race/ethnicity-adjusted hazard ratios for all-cause mortality  
in diabetics compared to non diabetics – MEN**

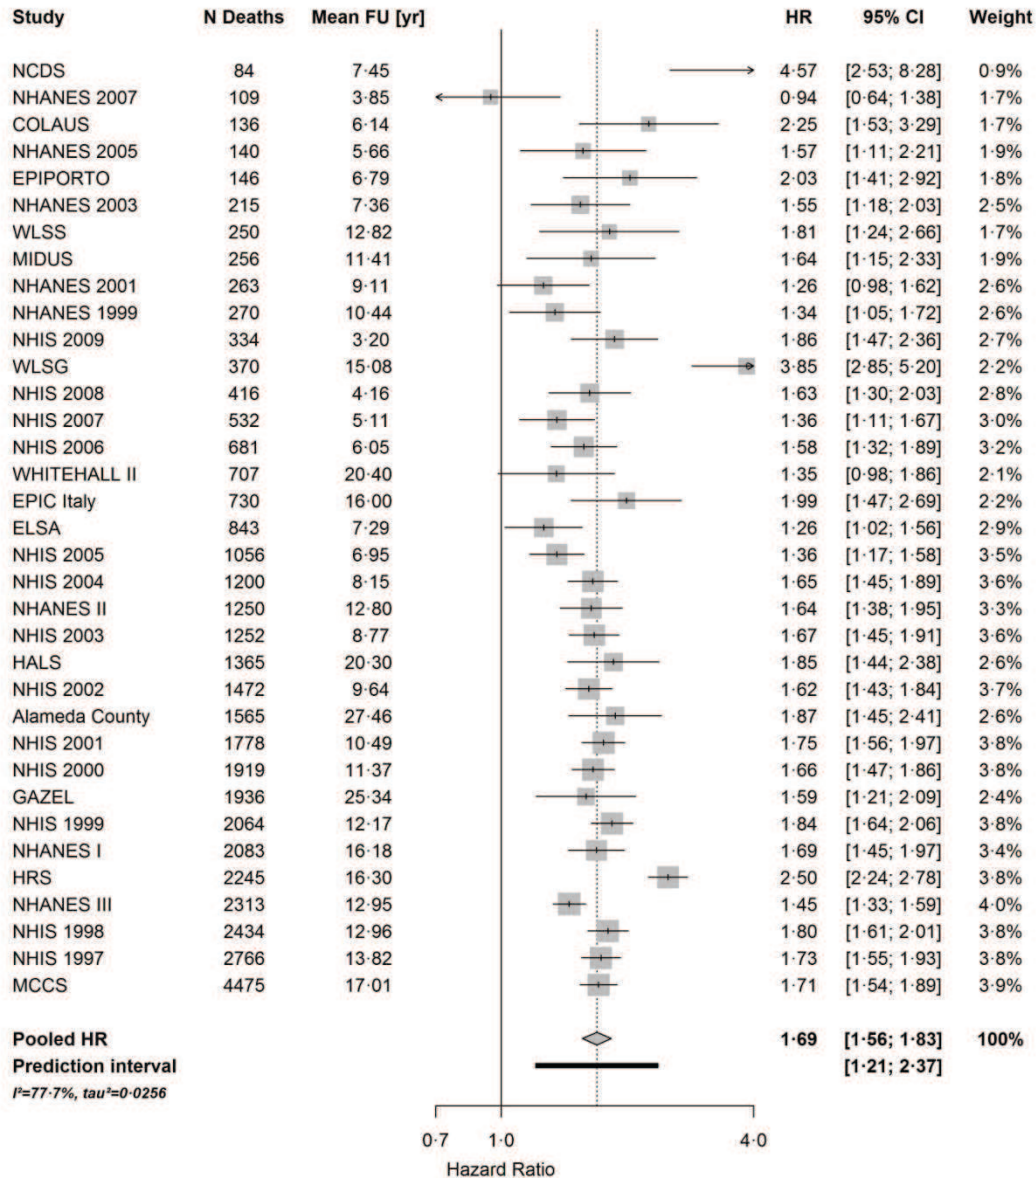

Pooled HR is represented with a gray diamond and the 95% prediction interval with a black bar.  $I^2$  statistic is the percentage of between study heterogeneity;  $\tau^2$  statistics measures the inter-study variance. The prediction interval provides a predicted range for the true association between diabetes and all-cause mortality.

**Age-, marital status- and race/ethnicity-adjusted hazard ratios for all-cause mortality  
in diabetics compared to non diabetics – WOMEN**

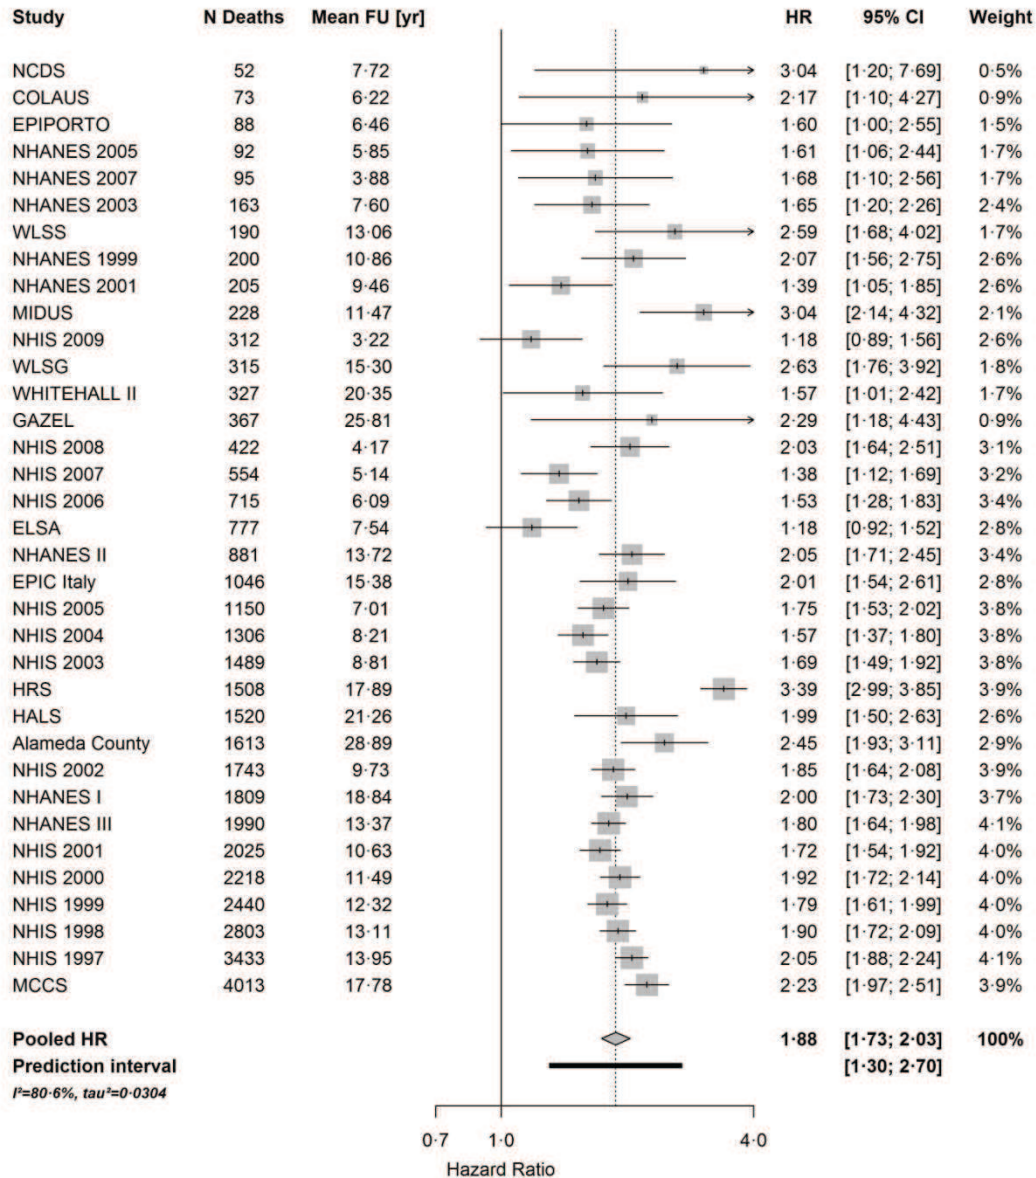

Pooled HR is represented with a gray diamond and the 95% prediction interval with a black bar.  $I^2$  statistic is the percentage of between study heterogeneity;  $\tau^2$  statistics measures the inter-study variance. The prediction interval provides a predicted range for the true association between diabetes and all-cause mortality.

**Age-, marital status- and race/ethnicity-adjusted hazard ratios for all-cause mortality  
in physically inactive compared to physically active participants – MEN**

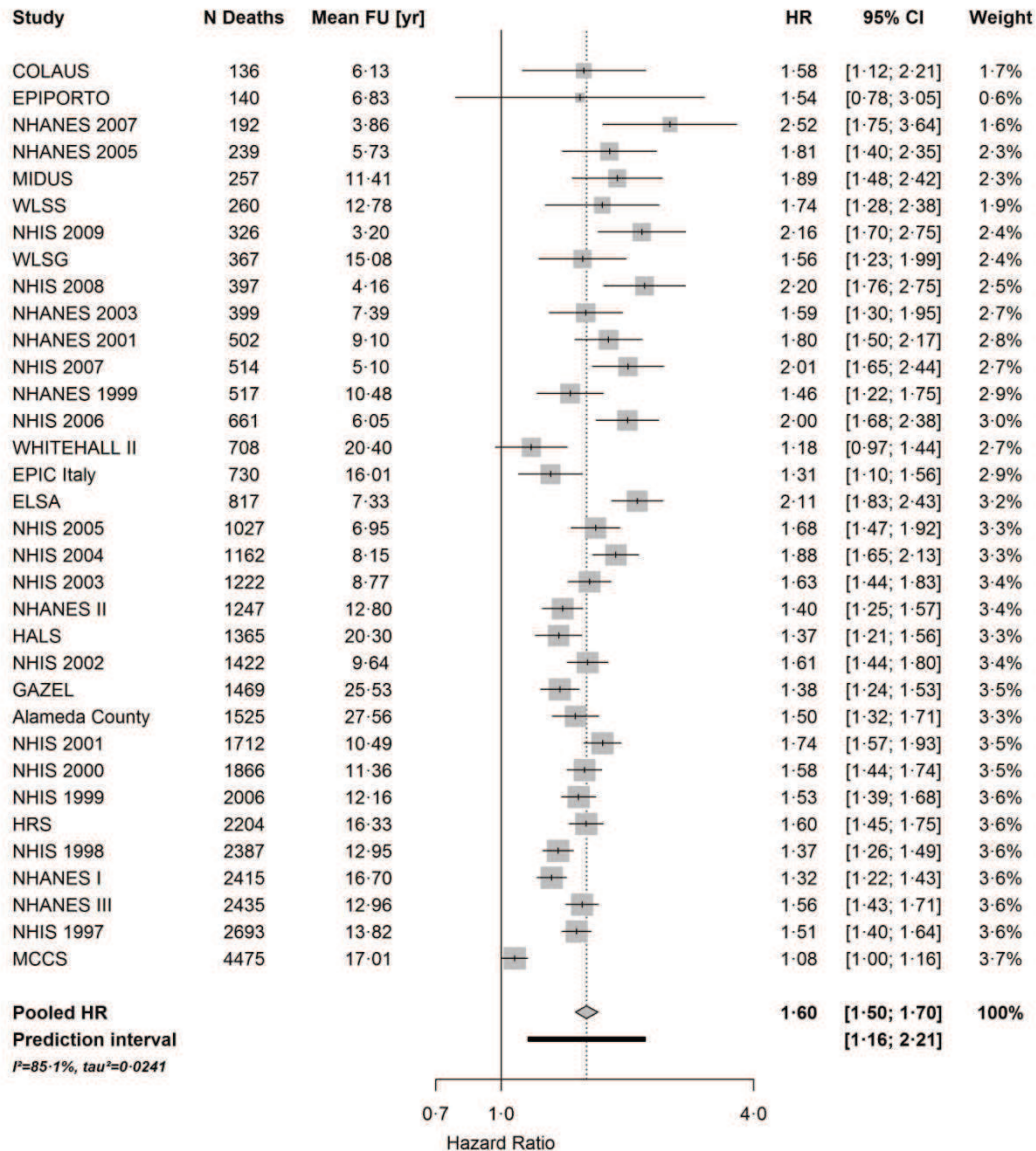

Pooled HR is represented with a gray diamond and the 95% prediction interval with a black bar.  $I^2$  statistic is the percentage of between study heterogeneity;  $\tau^2$  statistics measures the inter-study variance. The prediction interval provides a predicted range for the true association between physical inactivity and all-cause mortality.



**Age-, marital status- and race/ethnicity-adjusted hazard ratios for all-cause mortality  
in physically active compared to physically active participants – WOMEN**

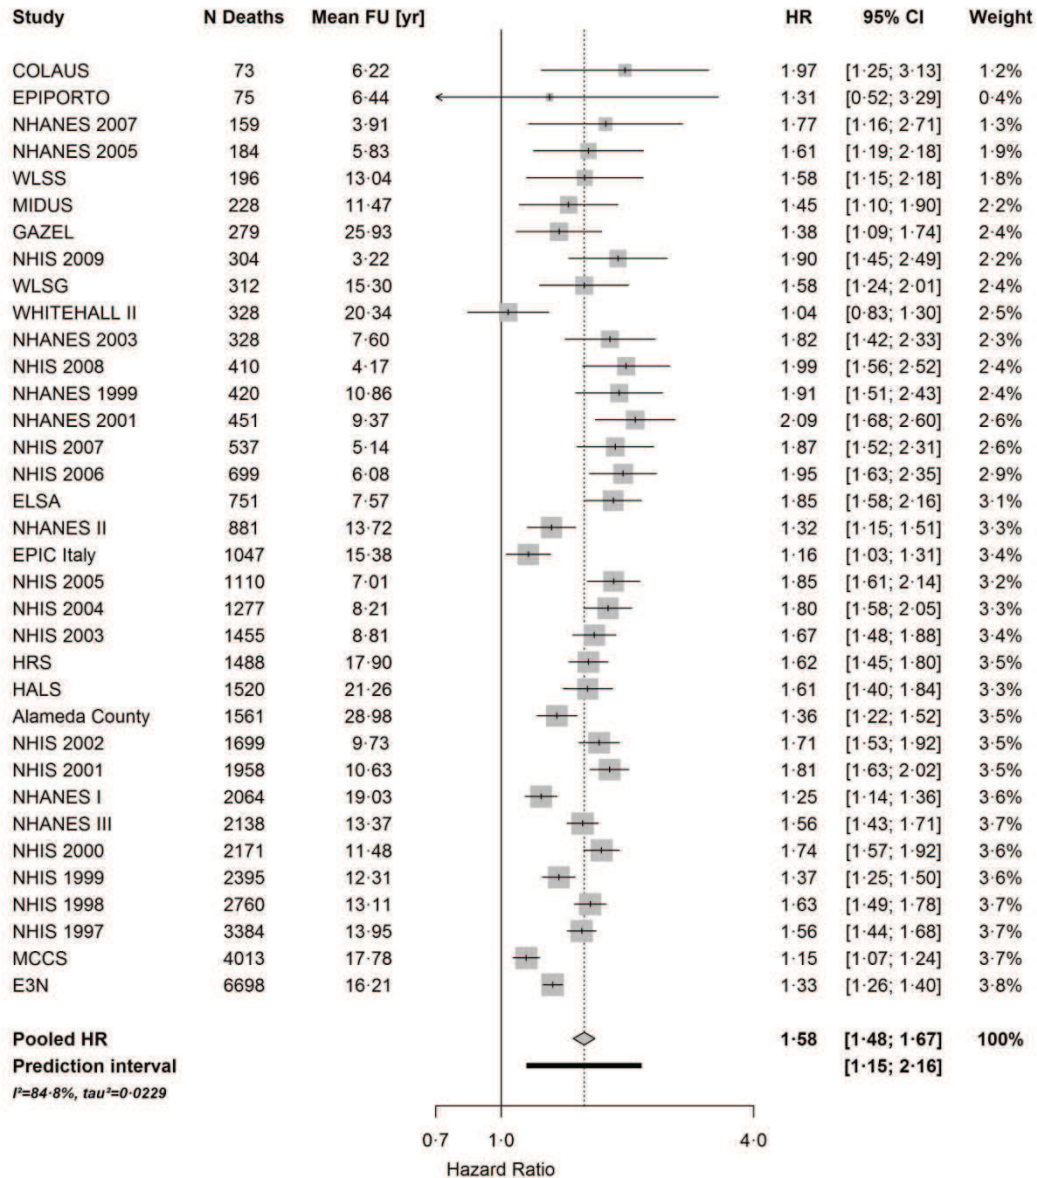

Pooled HR is represented with a gray diamond and the 95% prediction interval with a black bar.  $I^2$  statistic is the percentage of between study heterogeneity;  $\tau^2$  statistics measures the inter-study variance. The prediction interval provides a predicted range for the true association between physical inactivity and all-cause mortality.

**Age-, marital status- and race/ethnicity-adjusted hazard ratios for all-cause mortality in participants with high alcohol intake compared to those with moderate intake – MEN**

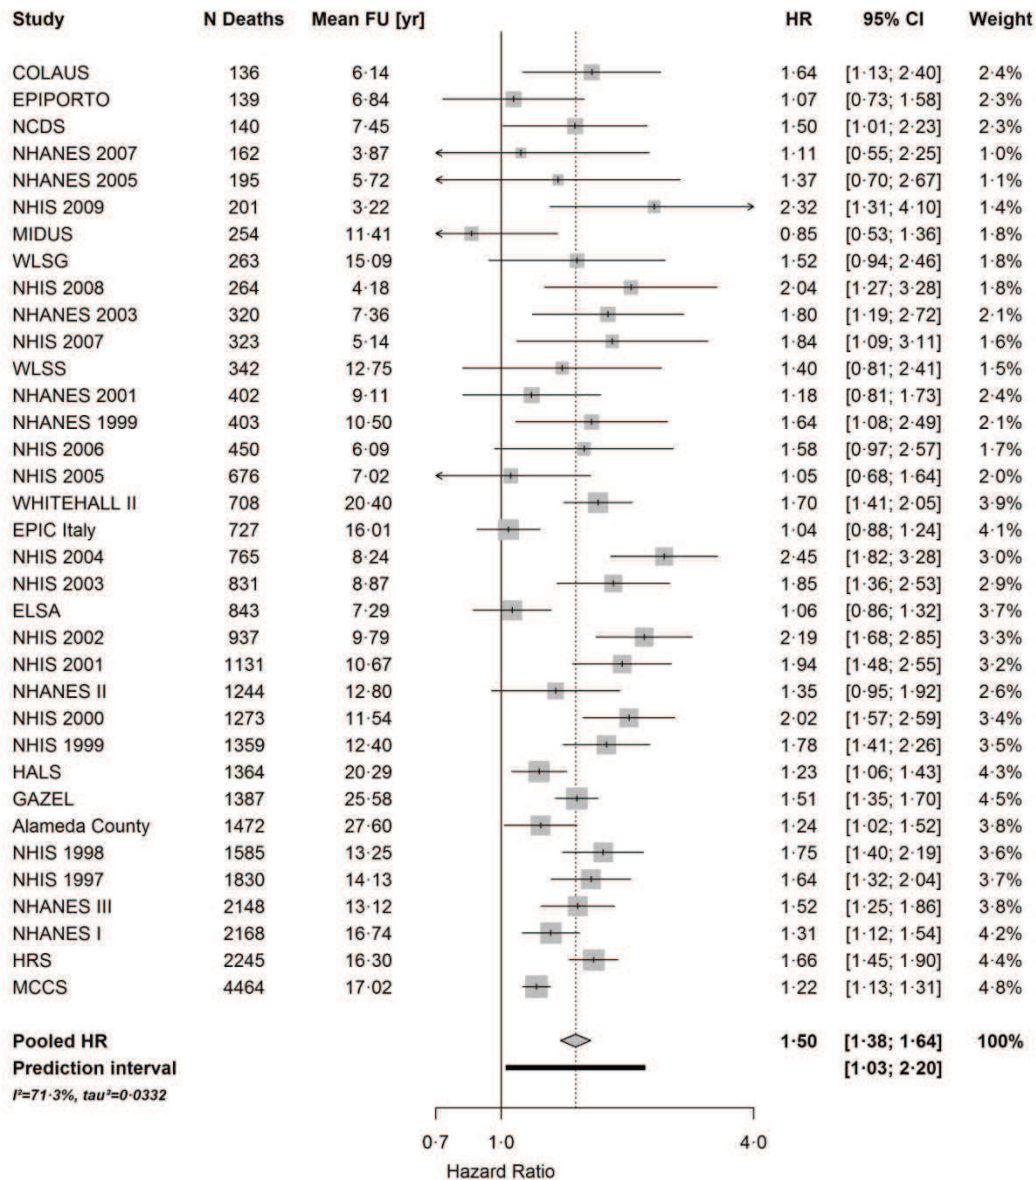

Pooled HR is represented with a gray diamond and the 95% prediction interval with a black bar.  $I^2$  statistic is the percentage of between study heterogeneity;  $\tau^2$  statistics measures the inter-study variance. The prediction interval provides a predicted range for the true association between high alcohol intake and all-cause mortality.

**Age-, marital status- and race/ethnicity-adjusted hazard ratios for all-cause mortality  
in participants with high alcohol intake compared to those with moderate intake – WOMEN**

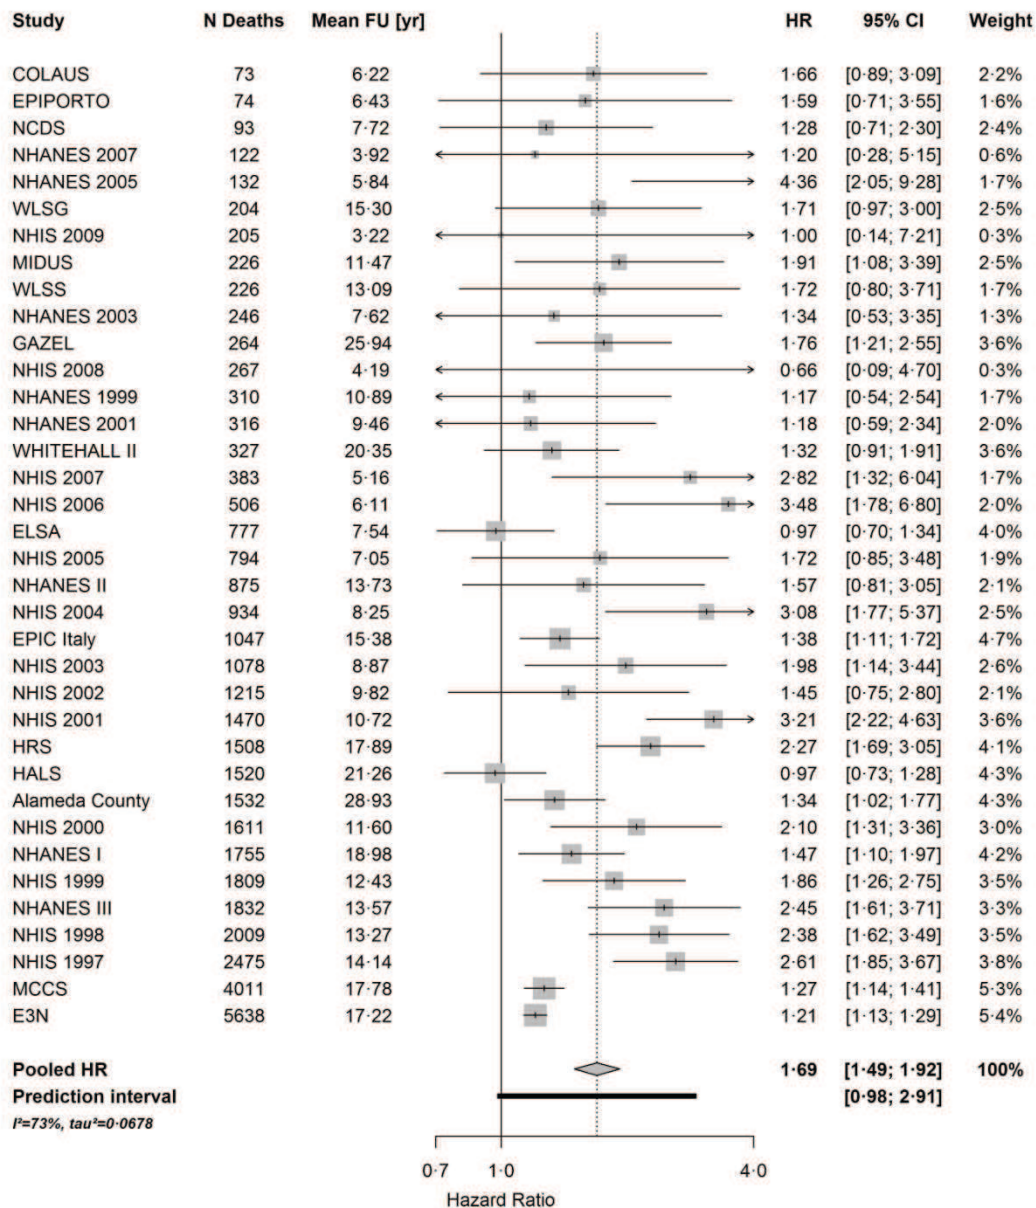

Pooled HR is represented with a gray diamond and the 95% prediction interval with a black bar.  $I^2$  statistic is the percentage of between study heterogeneity;  $\tau^2$  statistics measures the inter-study variance. The prediction interval provides a predicted range for the true association between high alcohol intake and all-cause mortality.



**Age-, marital status- and race/ethnicity-adjusted hazard ratios for all-cause mortality  
in hypertensive compared to normotensive participants – MEN**

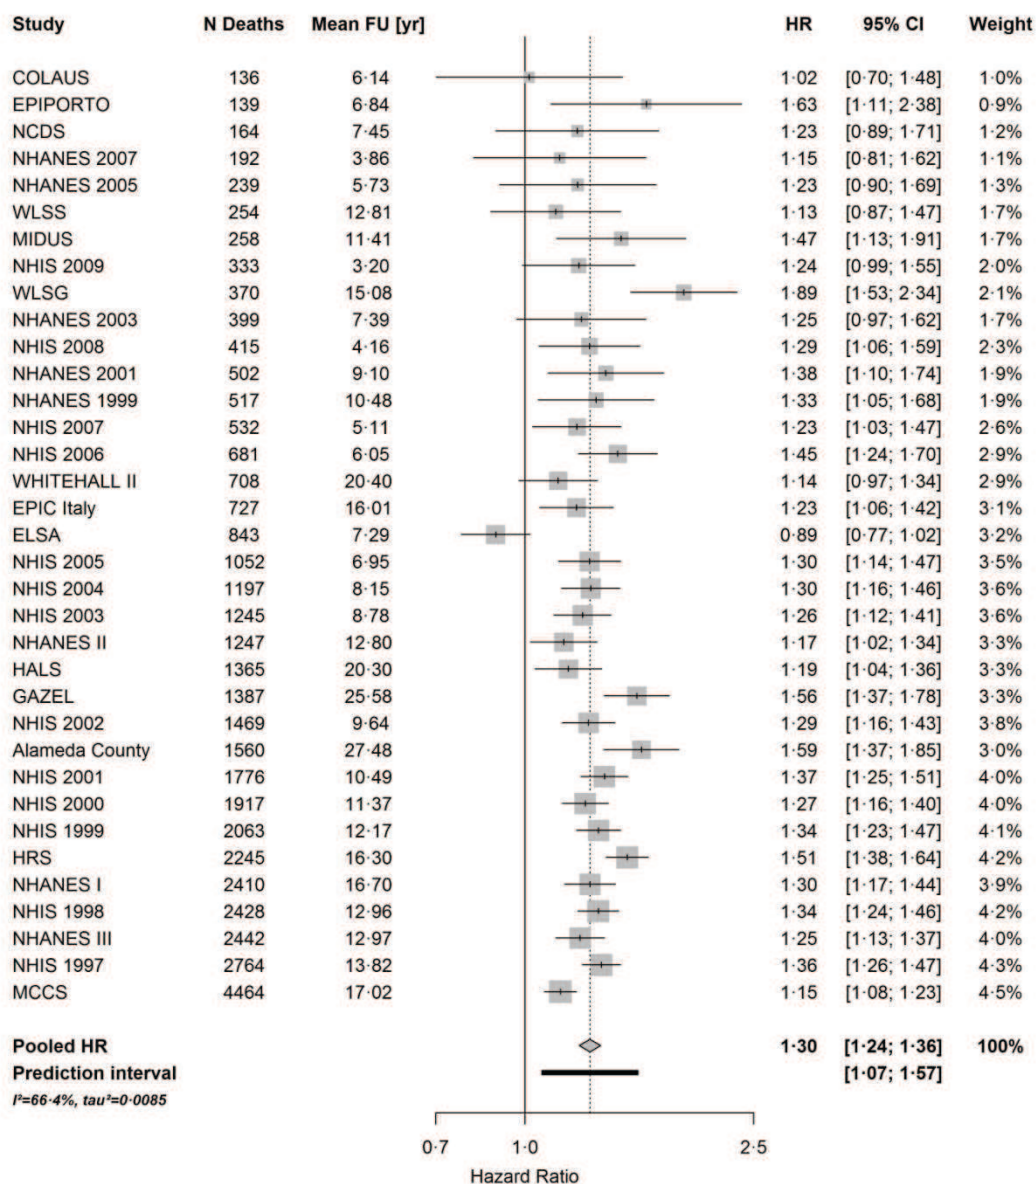

Pooled HR is represented with a gray diamond and the 95% prediction interval with a black bar.  $I^2$  statistic is the percentage of between study heterogeneity;  $\tau^2$  statistics measures the inter-study variance. The prediction interval provides a predicted range for the true association between hypertension and all-cause mortality.

**Age-, marital status- and race/ethnicity-adjusted hazard ratios for all-cause mortality  
in hypertensive compared to normotensive participants – WOMEN**

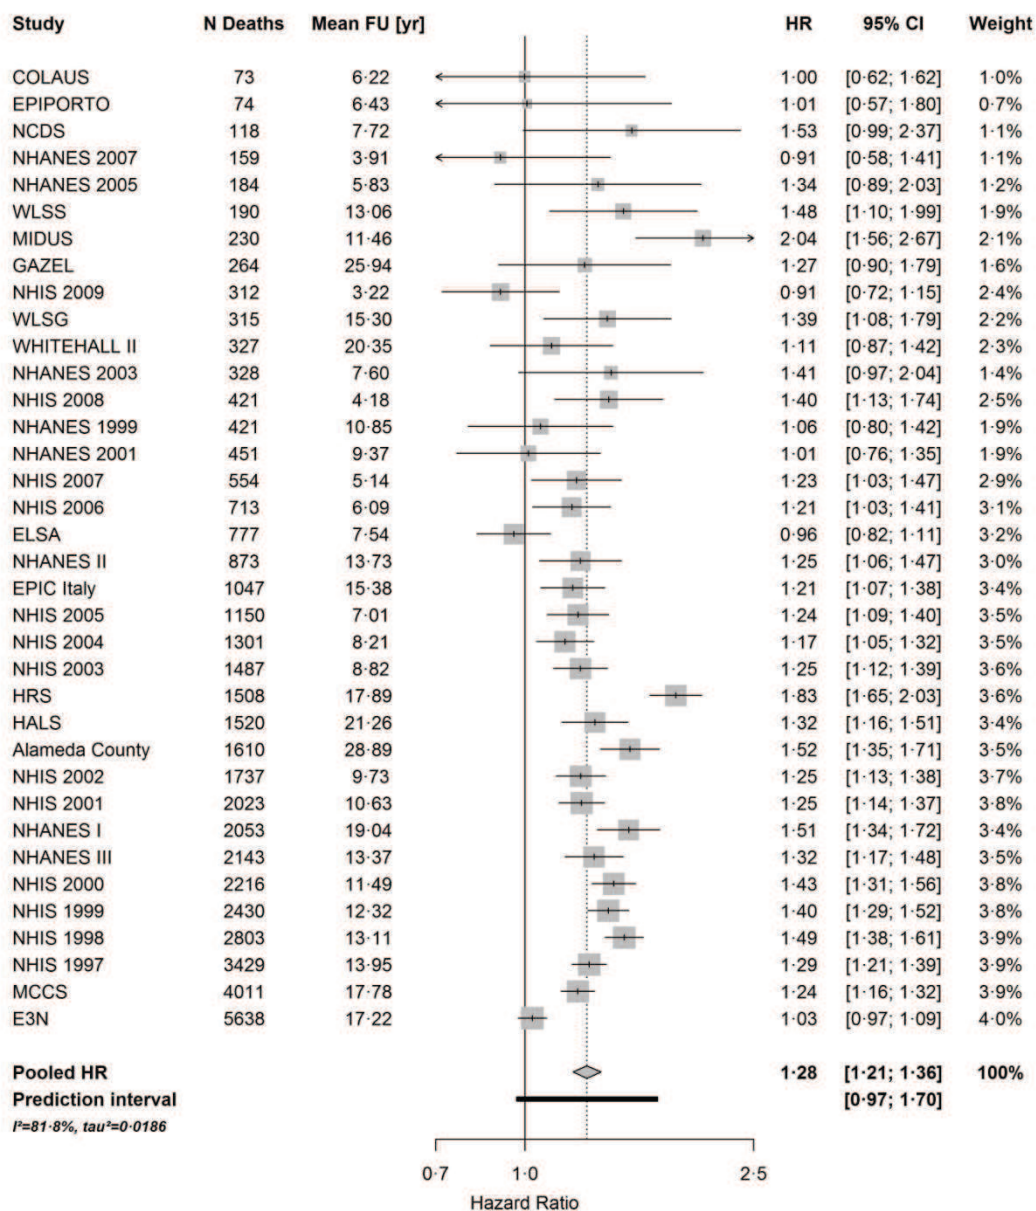

Pooled HR is represented with a gray diamond and the 95% prediction interval with a black bar.  $I^2$  statistic is the percentage of between study heterogeneity;  $\tau^2$  statistics measures the inter-study variance. The prediction interval provides a predicted range for the true association between hypertension and all-cause mortality.



**Age-, marital status- and race/ethnicity-adjusted hazard ratios for all-cause mortality  
in obese compared to normal BMI participants – MEN**

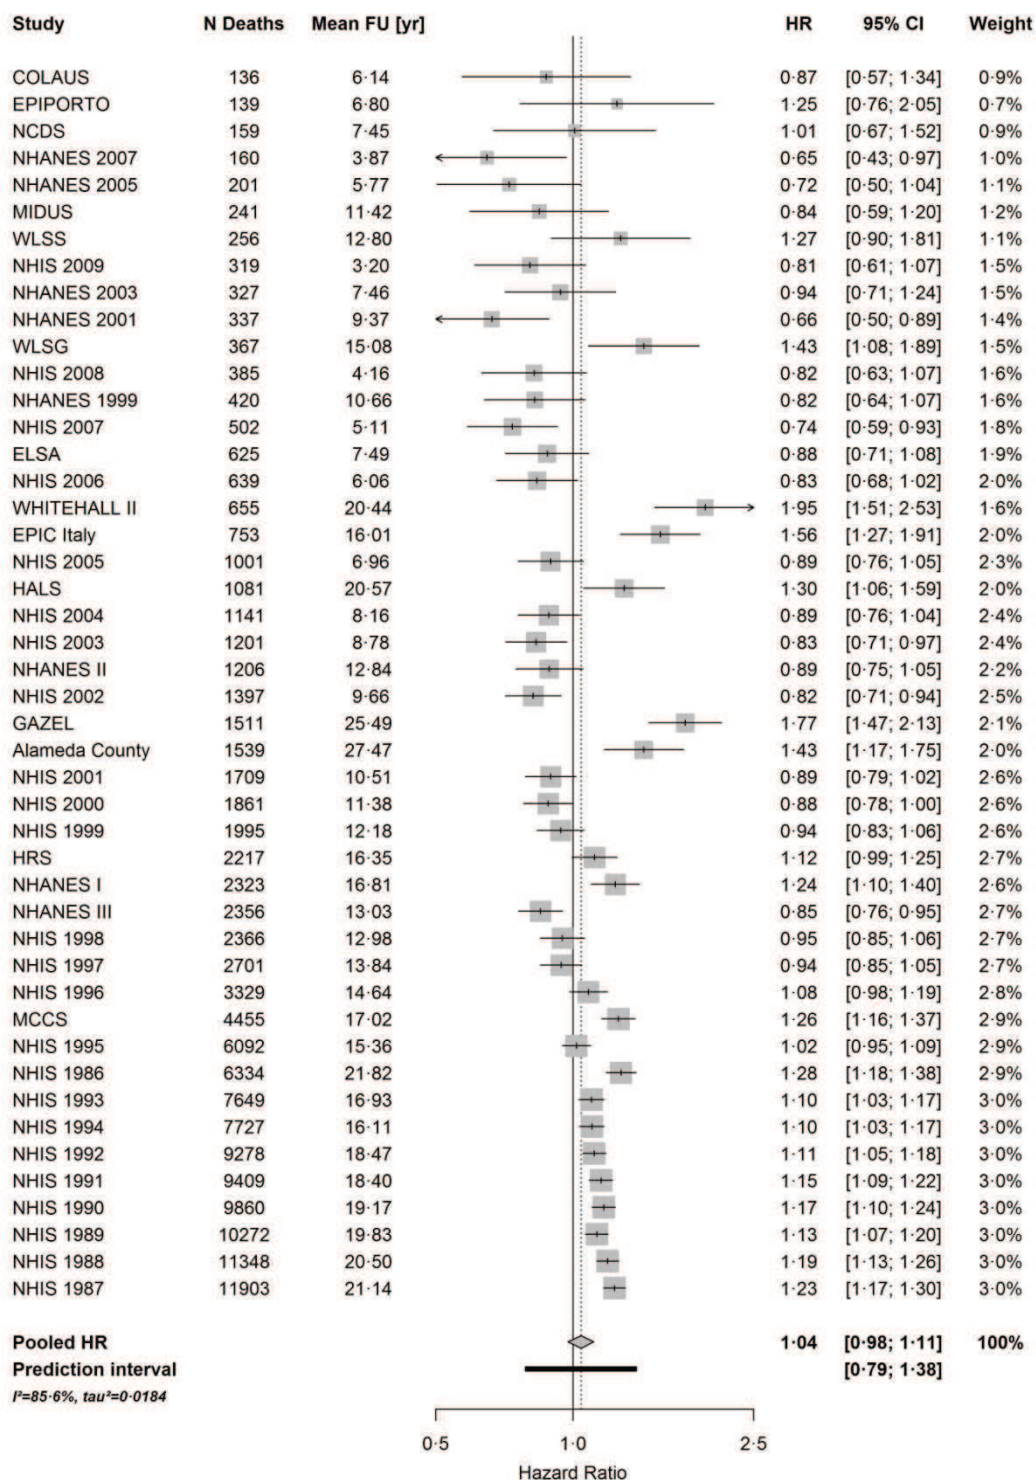

Pooled HR is represented with a gray diamond and the 95% prediction interval with a black bar.  $I^2$  statistic is the percentage of between study heterogeneity;  $\tau^2$  statistics measures the inter-study variance. The prediction interval provides a predicted range for the true association between obesity and all-cause mortality.

**Age-, marital status- and race/ethnicity-adjusted hazard ratios for all-cause mortality  
in obese compared to normal BMI participants – WOMEN**

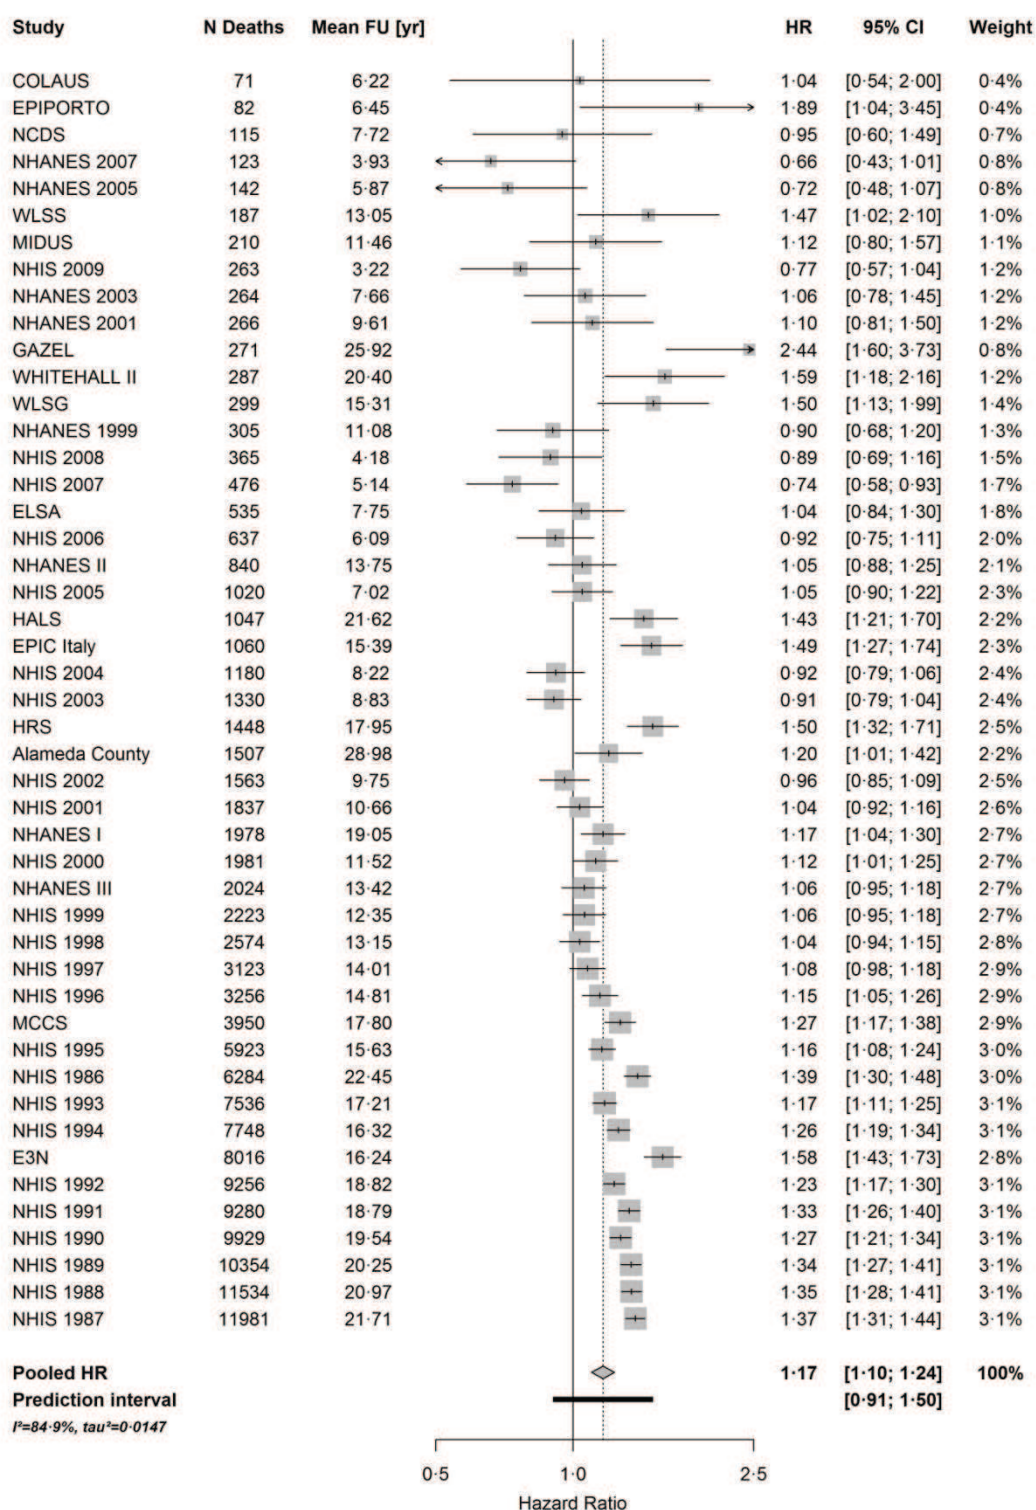

Pooled HR is represented with a gray diamond and the 95% prediction interval with a black bar.  $I^2$  statistic is the percentage of between study heterogeneity;  $\tau^2$  statistics measures the inter-study variance. The prediction interval provides a predicted range for the true association between obesity and all-cause mortality.
